# Supplementary material for: Realizing diverse electronic and magnetic properties in hybrid zigzag BNC nanoribbons via hydrogenation
Source: Royal Society of Chemistry journal article supplement (doi:10.1039/c5cp06069a), 2015-11-23
Supplement: c5cp06069a1.pdf [file c5cp06069a1.pdf]

## **Electronic supplementary information**

### **Realizing the Diverse Electronic and Magnetic Properties in the Hybrid Zigzag BNC Nanoribbons via Hydrogenation**

Yuanhui Sun, Guangtao Yu, Jingwei Liu, Xiaopeng Shen, Xuri Huang, Wei Chen\*

*Institute of Theoretical Chemistry, International Joint Research Laboratory of Nano-Micro Architecture Chemistry, Jilin University, Changchun 130023, People's Republic of China*

\*To whom correspondence should be addressed. Email: [xychwei@gmail.com](mailto:xychwei@gmail.com)

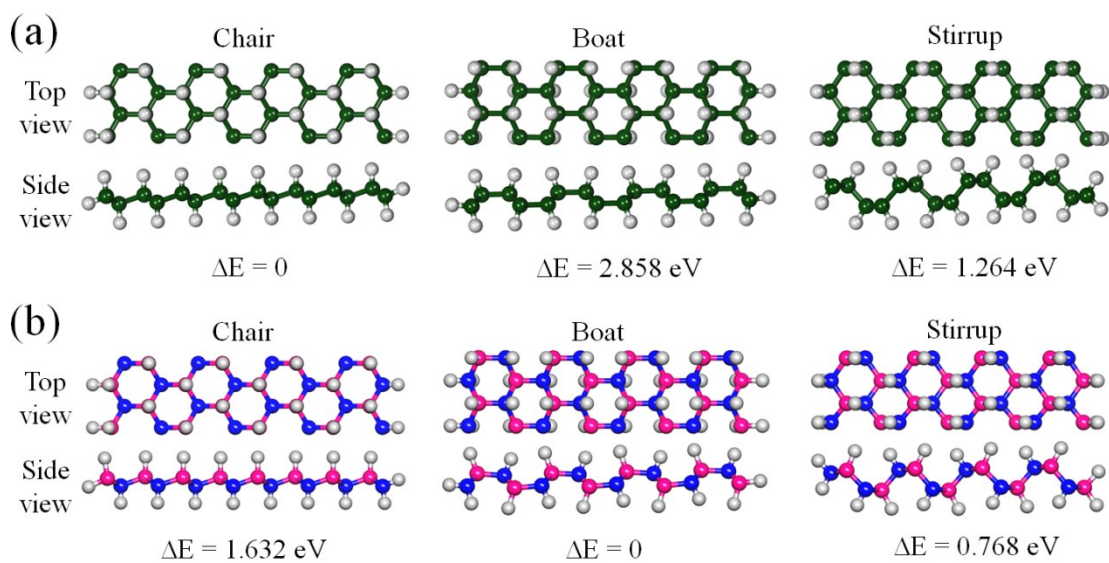

**Figure S1.** Top and side views of *fH*-zGNR (a) and *fH*-zBNNR (b) with chair, boat and stirrup configurations, as well as the relative energies ( $\Delta E$ ) of different configurations to the most one. It is shown that the chair-like and boat-like configurations are the energetically most favorable for *fH*-zGNR and *fH*-zBNNR, respectively.

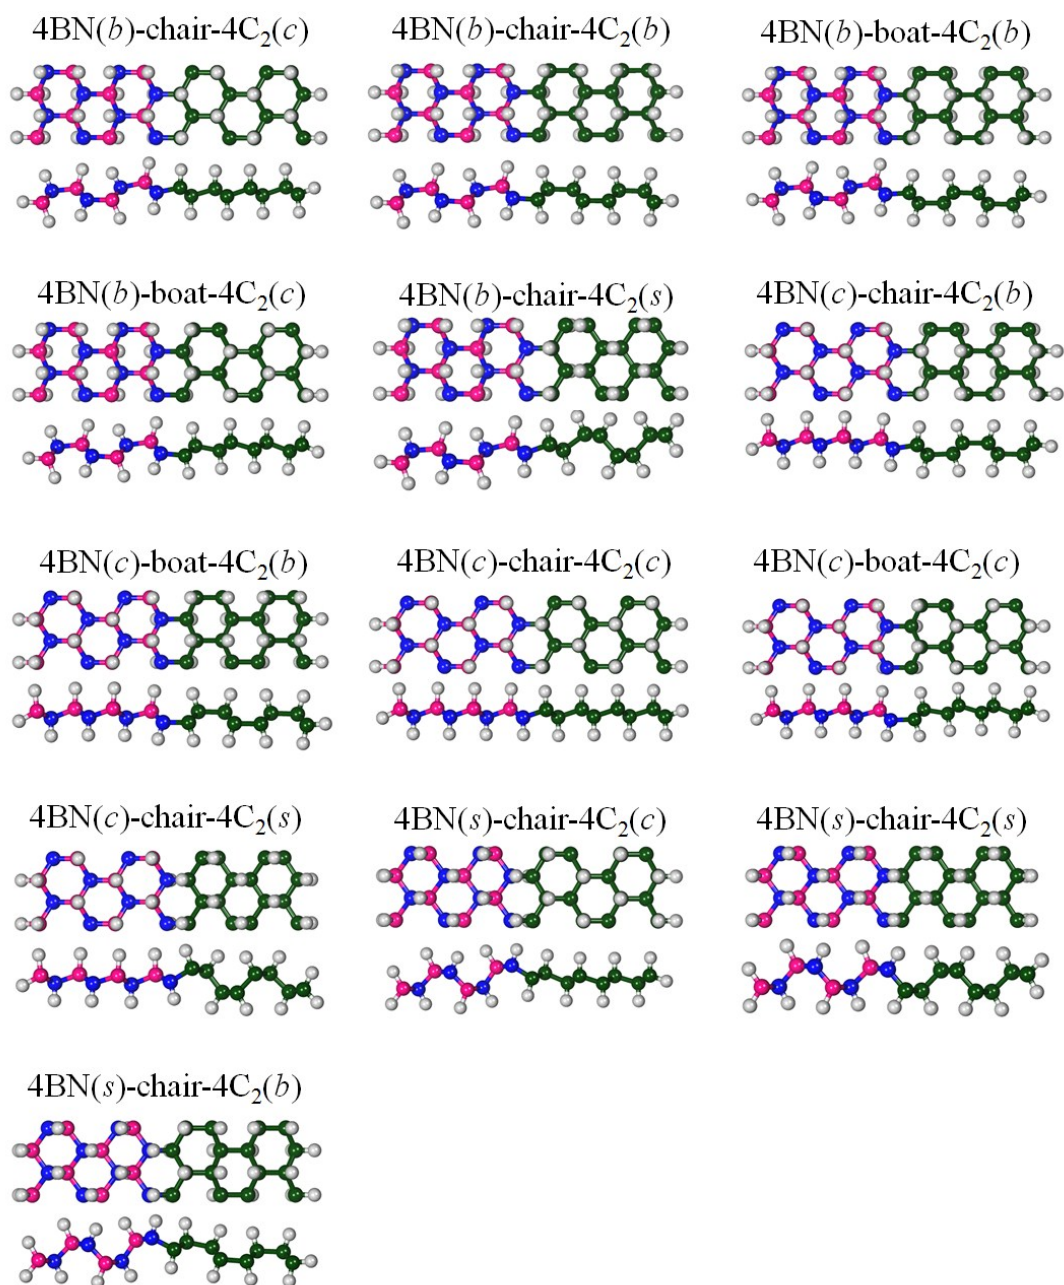

**Figure S2.** The obtained geometrical structures of the fully hydrogenated *fH*-zBNCNRs with the interfacial N-C connection by considering three possible hydrogenated configurations of chair, boat and stirrup for the constituent BN or C segment, as well as two possible modes of connection (chair or boat) between these two segments.

**Table S1.** The relative energies ( $\Delta E$ ) of different magnetic couplings to the ground state and the corresponding electronic properties for the possible  $fH$ -zBNCNR configurations with the interfacial N-C connection, as well as their relative energies ( $E_{\text{rel}}$ ) to the lowest-lying one. NM, FM and AFM represent the nonmagnetic, ferromagnetic and antiferromagnetic spin couplings, respectively.

| System                                             | $E_{\text{rel}}$ (meV) | $\Delta E$ (meV) |     |      | Electronic properties        | Band gap (eV) |
|----------------------------------------------------|------------------------|------------------|-----|------|------------------------------|---------------|
|                                                    |                        | NM               | FM  | AFM  |                              |               |
| 4BN( <i>b</i> )-chair-4C <sub>2</sub> ( <i>c</i> ) | 0.0                    | 0.0              | --  | --   | Semiconductor                | 1.756         |
| 4BN( <i>b</i> )-chair-4C <sub>2</sub> ( <i>b</i> ) | 1160.2                 | 0.0              | --  | --   | Semiconductor                | 1.703         |
| 4BN( <i>b</i> )-boat-4C <sub>2</sub> ( <i>b</i> )  | 1592.3                 | 0.0              | --  | --   | Semiconductor                | 1.721         |
| 4BN( <i>b</i> )-boat-4C <sub>2</sub> ( <i>c</i> )  | 359.7                  | 0.0              | --  | --   | Semiconductor                | 1.756         |
| 4BN( <i>b</i> )-chair-4C <sub>2</sub> ( <i>s</i> ) | 769.8                  | 0.0              | --  | --   | Semiconductor                | 1.547         |
| 4BN( <i>c</i> )-chair-4C <sub>2</sub> ( <i>b</i> ) | 2350.3                 | 1.9              | 0.0 | 1.6  | Metallicity                  | --            |
| 4BN( <i>c</i> )-boat-4C <sub>2</sub> ( <i>b</i> )  | 2796.6                 | 1.1              | 0.0 | 0.3  | Metallicity/Half-metallicity | --            |
| 4BN( <i>c</i> )-chair-4C <sub>2</sub> ( <i>c</i> ) | 1123.8                 | 0.0              | 4.6 | 13.7 | Semiconductor                | 0.020         |
| 4BN( <i>c</i> )-boat-4C <sub>2</sub> ( <i>c</i> )  | 1633.4                 | 2.1              | 0.0 | 2.3  | Half-metallicity             | --            |
| 4BN( <i>c</i> )-chair-4C <sub>2</sub> ( <i>s</i> ) | 1922.2                 | 1.7              | 1.8 | 0.0  | Half-metallicity             | --            |
| 4BN( <i>s</i> )-chair-4C <sub>2</sub> ( <i>c</i> ) | 414.5                  | 4.0              | 0.0 | 3.0  | Metallicity                  | --            |
| 4BN( <i>s</i> )-chair-4C <sub>2</sub> ( <i>s</i> ) | 1826.7                 | 4.8              | 0.9 | 0.0  | Metallicity/Half-metallicity | --            |
| 4BN( <i>s</i> )-chair-4C <sub>2</sub> ( <i>b</i> ) | 2867.9                 | 4.5              | 0.1 | 0.0  | Metallicity/Half-metallicity | --            |

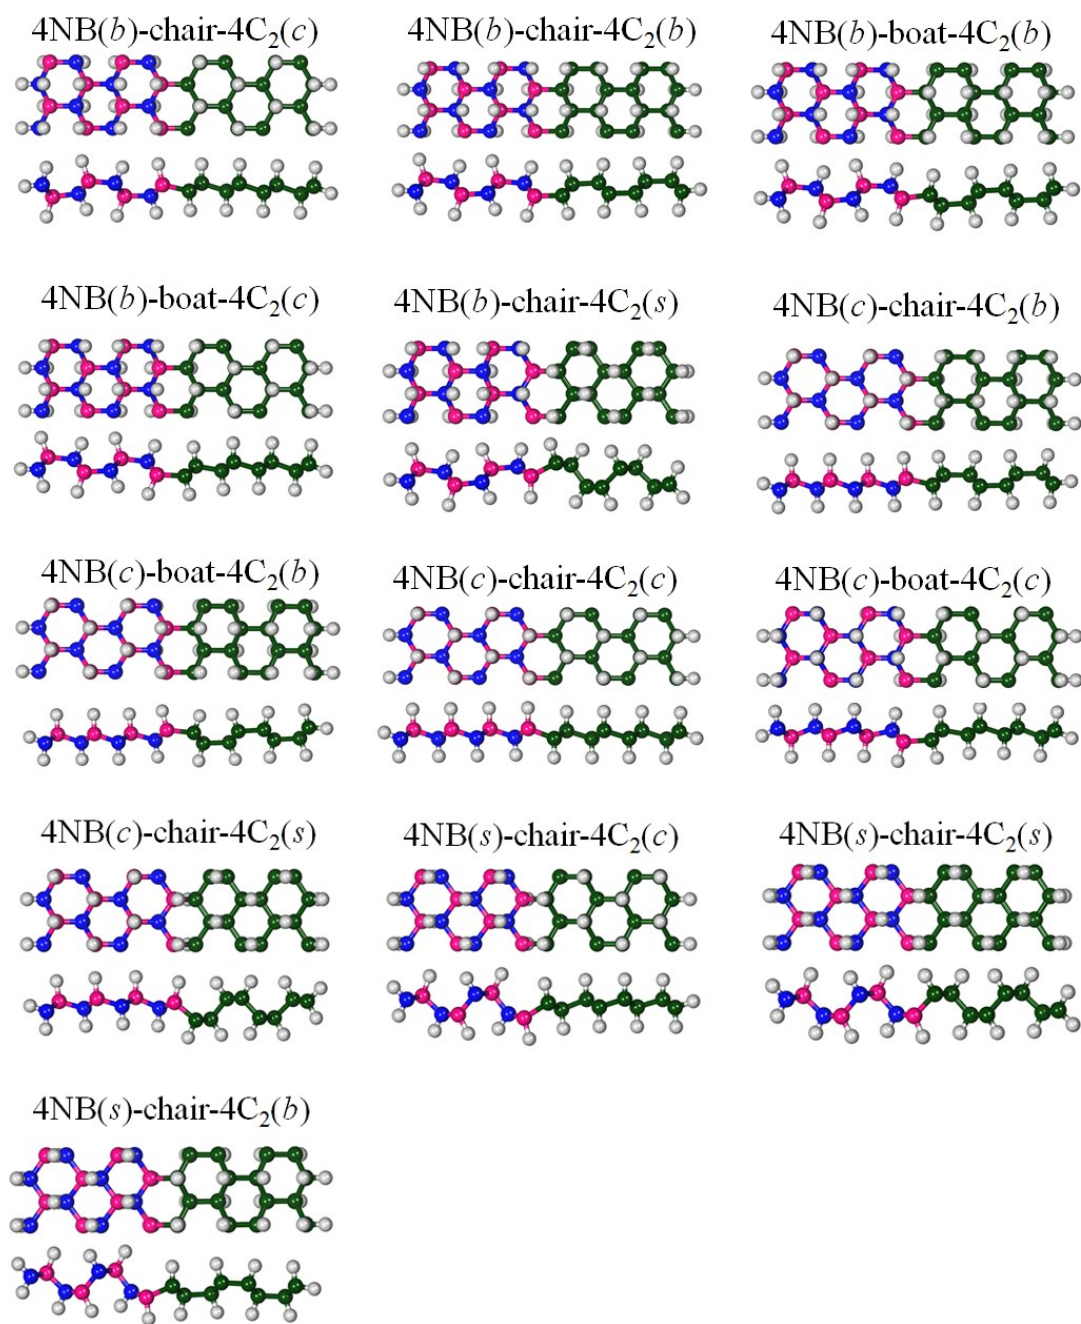

**Figure S3.** The obtained geometrical structures of the fully hydrogenated *fH*-zBNCNRs with the interfacial B-C connection by considering three possible hydrogenated configurations of chair, boat and stirrup for the constituent BN or C segment, as well as two possible modes of connection (chair or boat) between these two segments.

**Table S2.** The relative energies ( $\Delta E$ ) of different magnetic couplings to the ground state and the corresponding electronic properties for the possible  $fH$ -zBNCNR configurations with the interfacial B-C connection, as well as their relative energies ( $E_{\text{rel}}$ ) to the lowest-lying one. NM, FM and AFM represent the nonmagnetic, ferromagnetic and antiferromagnetic spin couplings, respectively.

| System                                             | $E_{\text{rel}}$ (meV) | $\Delta E$ (meV) |     |     | Electronic properties        | Band gap (eV) |
|----------------------------------------------------|------------------------|------------------|-----|-----|------------------------------|---------------|
|                                                    |                        | NM               | FM  | AFM |                              |               |
| 4NB( <i>b</i> )-chair-4C <sub>2</sub> ( <i>c</i> ) | 0.0                    | 0.0              | --  | --  | Semiconductor                | 0.217         |
| 4NB( <i>b</i> )-chair-4C <sub>2</sub> ( <i>b</i> ) | 1180.4                 | 0.0              | --  | --  | Semiconductor                | 0.328         |
| 4NB( <i>b</i> )-boat-4C <sub>2</sub> ( <i>b</i> )  | 1376.9                 | 0.0              | --  | --  | Semiconductor                | 0.466         |
| 4NB( <i>b</i> )-boat-4C <sub>2</sub> ( <i>c</i> )  | 199.9                  | 0.0              | --  | --  | Semiconductor                | 0.479         |
| 4NB( <i>b</i> )-chair-4C <sub>2</sub> ( <i>s</i> ) | 945.0                  | 0.0              | --  | --  | Semiconductor                | 0.289         |
| 4NB( <i>c</i> )-chair-4C <sub>2</sub> ( <i>b</i> ) | 2355.9                 | 5.7              | 0.0 | 0.3 | Metallicity/Half-metallicity | --            |
| 4NB( <i>c</i> )-boat-4C <sub>2</sub> ( <i>b</i> )  | 2754.9                 | 6.1              | 0.0 | 0.1 | Metallicity/Half-metallicity | --            |
| 4NB( <i>c</i> )-chair-4C <sub>2</sub> ( <i>c</i> ) | 922.4                  | 6.4              | 1.4 | 0.0 | Half-metallicity             | --            |
| 4NB( <i>c</i> )-boat-4C <sub>2</sub> ( <i>c</i> )  | 1545.5                 | 6.4              | 1.8 | 0.0 | Half-metallicity             | --            |
| 4NB( <i>c</i> )-chair-4C <sub>2</sub> ( <i>s</i> ) | 1575.2                 | 3.8              | 0.2 | 0.0 | Metallicity/Half-metallicity | --            |
| 4NB( <i>s</i> )-chair-4C <sub>2</sub> ( <i>c</i> ) | 1112.3                 | 4.2              | 0.9 | 0.0 | Metallicity/Half-metallicity | --            |
| 4NB( <i>s</i> )-chair-4C <sub>2</sub> ( <i>s</i> ) | 1661.8                 | 9.4              | 0.9 | 0.0 | Metallicity/Half-metallicity | --            |
| 4NB( <i>s</i> )-chair-4C <sub>2</sub> ( <i>b</i> ) | 2753.7                 | 9.0              | 2.4 | 0.0 | Half-metallicity             | --            |

**Table S3.** The most favorable boat conformation and the corresponding nonmagnetic (NM) ground state for the fully hydrogenated *f*H-4-zBNNR and *f*H-6-zBNNR systems.

| System             | 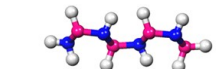 | $\Delta E$ (meV) |    |     |
|--------------------|-----------------------------------------------------------------------------------|------------------|----|-----|
|                    |                                                                                   | NM               | FM | AFM |
| <i>f</i> H-4-zBNNR |  | 0.0              | -- | --  |
| <i>f</i> H-6-zBNNR |  | 0.0              | -- | --  |

**Table S4.** Total magnetic moment per supercell for the magnetic ground states of *f*H-8-zBNNR, as well as fully and partially hybrid hydrogenated zBNCNRs systems. FM and AFM represent the ferromagnetic and antiferromagnetic spin couplings, respectively.

| Conformation                                                          | Ground State | Total Magnetic Moment( $\mu$ B) |
|-----------------------------------------------------------------------|--------------|---------------------------------|
| <i>f</i> H-8-zBNNR                                                    | FM/AFM       | 0.206/0.000                     |
| 6NB( <i>b</i> )-chair-2C <sub>2</sub> ( <i>c</i> )                    | AFM          | 0.000                           |
| 8BN( <i>b</i> )-chair-8C <sub>2</sub> ( <i>c</i> )                    | FM           | 0.256                           |
| 10BN( <i>b</i> )-chair-10C <sub>2</sub> ( <i>c</i> )                  | AFM          | 0.000                           |
| 6NB( <i>b</i> )-chair-6C <sub>2</sub> ( <i>c</i> )                    | FM           | 0.259                           |
| 8NB( <i>b</i> )-chair-8C <sub>2</sub> ( <i>c</i> )                    | FM           | 0.466                           |
| 10NB( <i>b</i> )-chair-10C <sub>2</sub> ( <i>c</i> )                  | AFM          | 0.168                           |
| <i>p</i> H-(BN) <sub>4</sub> (C <sub>2</sub> ) <sub>4</sub> -II(2,0)  | AFM          | 0.000                           |
| <i>p</i> H-(BN) <sub>4</sub> (C <sub>2</sub> ) <sub>4</sub> -II(4,0)  | AFM          | 0.000                           |
| <i>p</i> H-(BN) <sub>4</sub> (C <sub>2</sub> ) <sub>4</sub> -II(4,2)  | AFM          | 0.130                           |
| <i>p</i> H-(NB) <sub>4</sub> (C <sub>2</sub> ) <sub>4</sub> -II(2,0)  | AFM          | 0.000                           |
| <i>p</i> H-(NB) <sub>4</sub> (C <sub>2</sub> ) <sub>4</sub> -II(4,0)  | AFM          | 0.208                           |
| <i>p</i> H-(NB) <sub>4</sub> (C <sub>2</sub> ) <sub>4</sub> -II(4,2)  | AFM          | 0.084                           |
| <i>p</i> H-(BN) <sub>4</sub> (C <sub>2</sub> ) <sub>4</sub> -III(1,1) | AFM          | 0.000                           |
| <i>p</i> H-(NB) <sub>4</sub> (C <sub>2</sub> ) <sub>4</sub> -III(1,1) | AFM          | 0.000                           |



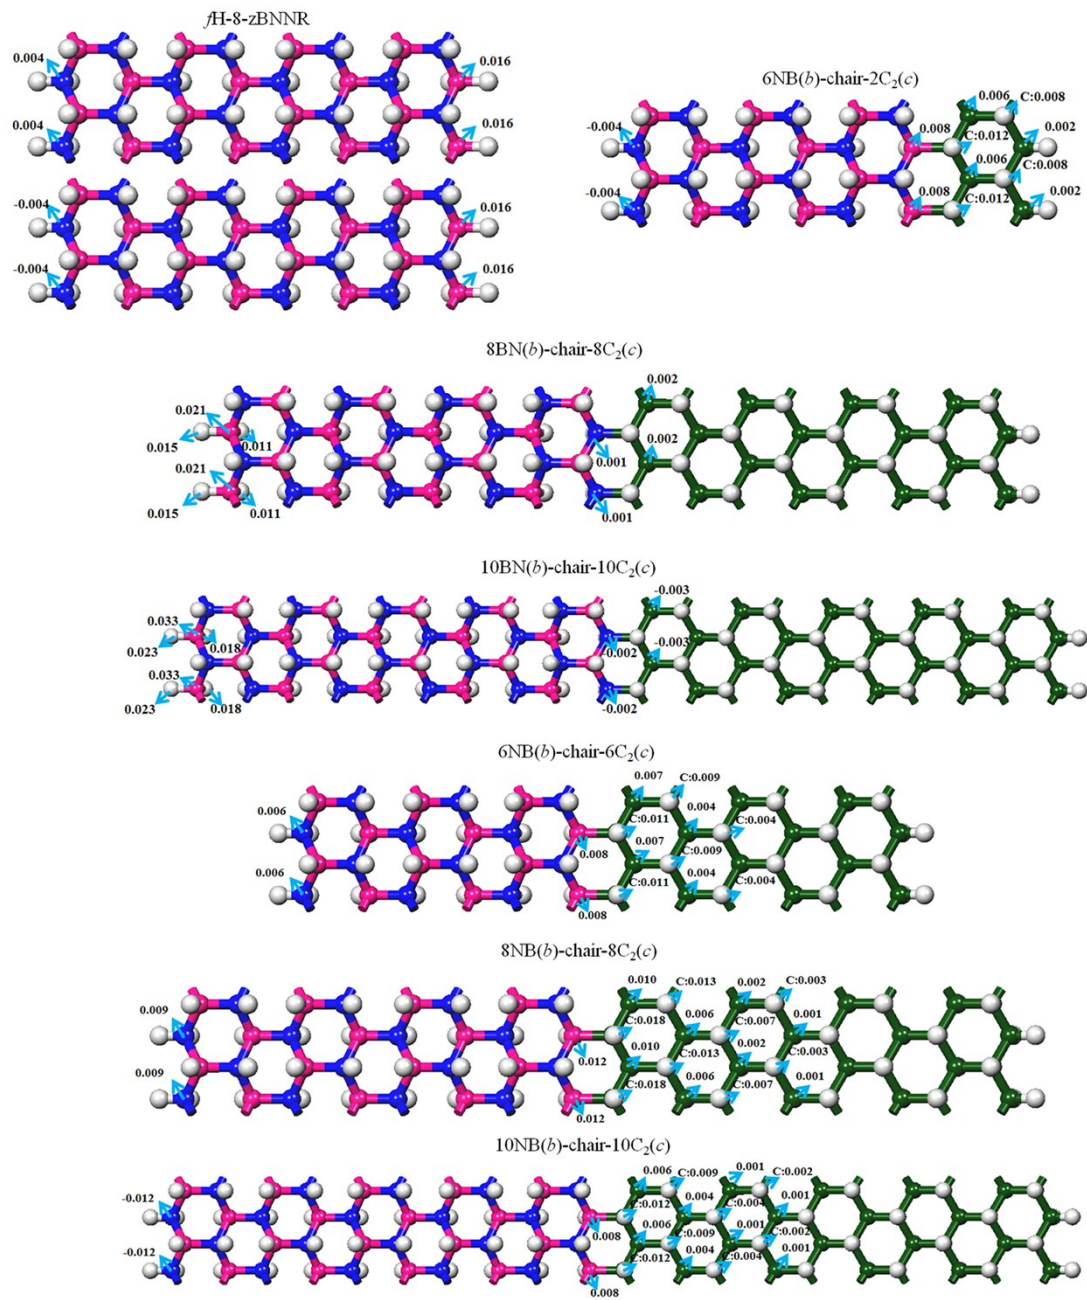

**Figure S4.** The distribution of atomic magnetic moments  $M$  ( $\mu\text{B}$ ) in supercell for the magnetic ground states of  $f\text{H-8-zBNNR}$  and fully hydrogenated zBNCNRs systems.

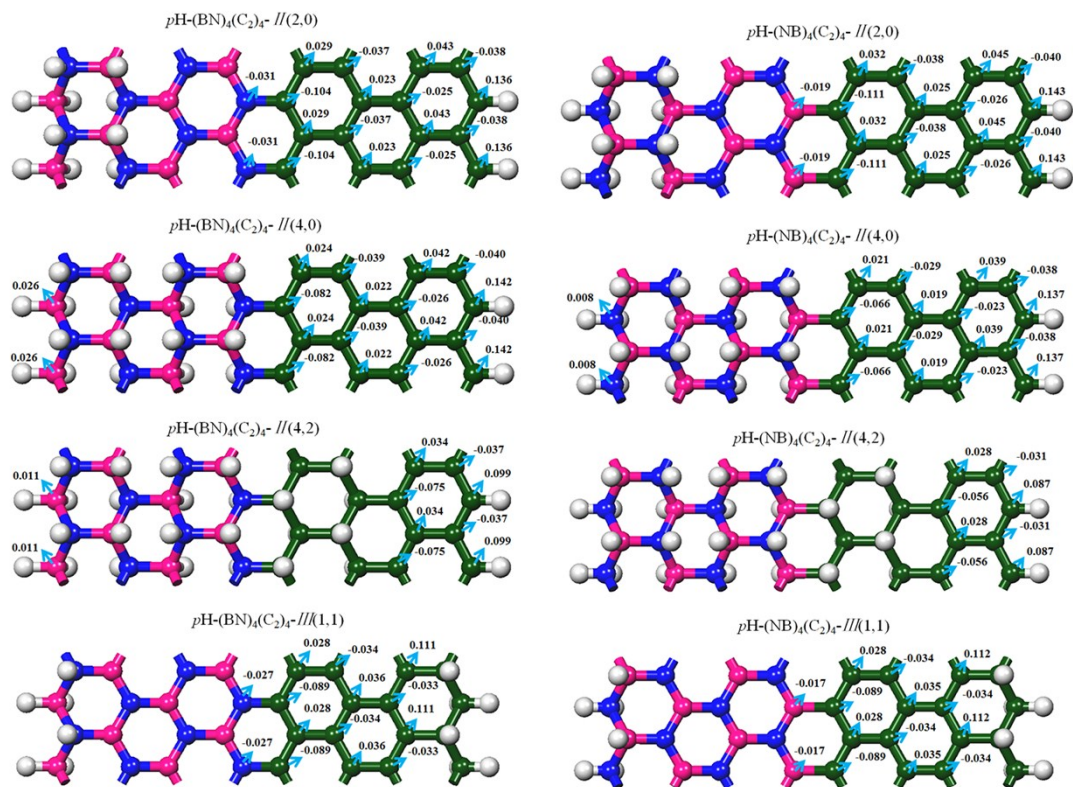

**Figure S5.** The distribution of atomic magnetic moments  $M$  ( $\mu\text{B}$ ) in supercell for the magnetic ground states of partially hydrogenated zBNCNRs systems.
